# Supplementary material for: Cold induces acute stress but heat is ultimately more deleterious for the reef-building coral Acropora yongei
Source: PubMed Central journal article supplement — Sci Rep. 2012 Feb 2;2:240. doi: 10.1038/srep00240 (PMC3270498; doi:10.1038/srep00240), 2012-02-02
Supplement: srep00240-s1.pdf [file srep00240-s1.pdf]

Supplementary information for manuscript:

Cold induces acute stress but heat is ultimately more deleterious for the reef-building coral  
*Acropora yongei*

Melissa S. Roth, Ralf Goericke, Dimitri D. Deheyn

Includes:

Supplementary Table S1

Supplementary Table S2

**Supplementary Table S1.** Summary of two-way ANOVA statistics to test the effects of temperature treatment and time during the 20 d experiment on *Acropora yongei*. The  $R^2$  value indicates the percentage of variance that is accounted for by each predictor variable, as well as the interaction term.  $R^2$  were calculated by dividing the sum of squares of the factor of consideration by the total of all sum of squares and the residuals; therefore nested ANOVA  $R^2$  values included the nested factor.

| Parameter                            | Treatment                |          |       | Time                     |          |       | Treatment x Time         |          |       |
|--------------------------------------|--------------------------|----------|-------|--------------------------|----------|-------|--------------------------|----------|-------|
|                                      | F statistic              | <i>P</i> | $R^2$ | F statistic              | <i>P</i> | $R^2$ | F statistic              | <i>P</i> | $R^2$ |
| Coral growth <sup>a</sup>            | F <sub>2,58</sub> =154.0 | <0.0001  | 0.63  | F <sub>3,58</sub> =6.0   | <0.01    | 0.04  | F <sub>6,58</sub> =3.3   | <0.01    | 0.04  |
| Dinoflagellate density               | F <sub>2,35</sub> =419.8 | <0.0001  | 0.40  | F <sub>2,35</sub> =243.0 | <0.0001  | 0.22  | F <sub>3,35</sub> =191.5 | <0.0001  | 0.36  |
| Chl <i>a</i>                         | F <sub>2,24</sub> =0.6   | 0.57     |       | F <sub>1,24</sub> =1.0   | 0.32     |       | F <sub>2,24</sub> =1.7   | 0.2      |       |
| Carotene : chl <i>a</i>              | F <sub>2,24</sub> =7.2   | <0.01    | 0.25  | F <sub>1,24</sub> =4.6   | <0.05    | 0.08  | F <sub>2,24</sub> =6.8   | <0.01    | 0.24  |
| Dt / (Dd + Dt)                       | F <sub>2,24</sub> =40.7  | <0.0001  | 0.34  | F <sub>1,24</sub> =65.6  | <0.0001  | 0.27  | F <sub>2,24</sub> =35.7  | <0.0001  | 0.29  |
| Dd + Dt : chl <i>a</i>               | F <sub>2,24</sub> =22.2  | <0.0001  | 0.32  | F <sub>1,24</sub> =34.2  | <0.0001  | 0.25  | F <sub>2,24</sub> =18.2  | <0.0001  | 0.26  |
| Effective quantum yield <sup>a</sup> | F <sub>2,90</sub> =232.5 | <0.0001  | 0.30  | F <sub>3,90</sub> =137.2 | <0.0001  | 0.26  | F <sub>6,90</sub> =88.9  | <0.0001  | 0.34  |
| Maximum quantum yield <sup>a</sup>   | F <sub>2,92</sub> =192.8 | <0.0001  | 0.33  | F <sub>3,92</sub> =88.9  | <0.0001  | 0.23  | F <sub>6,92</sub> =63.4  | <0.0001  | 0.32  |
| Pressure over PSII <sup>a</sup>      | F <sub>2,87</sub> =77.3  | <0.0001  | 0.24  | F <sub>3,87</sub> =47.5  | <0.0001  | 0.22  | F <sub>6,87</sub> =33.9  | <0.0001  | 0.32  |

<sup>a</sup>two-way nested ANOVA

**Supplementary Table S2.** Summary of *t*-tests to test the differences between cold treatment and control corals of *Acropora yongei* on 20 d.

| Parameter               | <i>t</i>    | <i>P</i> |
|-------------------------|-------------|----------|
| Chl <i>a</i>            | $t_5=0.12$  | 0.91     |
| Carotene : chl <i>a</i> | $t_8=-1.6$  | 0.14     |
| Dt / (Dd + Dt)          | $t_8=-4.1$  | <0.01    |
| Dd + Dt : chl <i>a</i>  | $t_8=-19.1$ | <0.0001  |
| Effective quantum yield | $t_7=12.7$  | <0.0001  |
| Maximum quantum yield   | $t_6=9.4$   | <0.0001  |
| Pressure over PSII      | $t_8=-8.9$  | <0.0001  |
